# Supplementary material for: The English (H6R) familial Alzheimer's disease mutation facilitates zinc-induced dimerization of the amyloid-β metal-binding domain
Source: Royal Society of Chemistry journal article supplement (doi:10.1039/c4mt00259h), 2015-01-01
Supplement: c4mt00259h1.pdf [file c4mt00259h1.pdf]

## Supplementary Information

### The English (H6R) familial Alzheimer's disease mutation facilitates zinc-induced dimerization of the amyloid- $\beta$ metal-binding domain

S. A. Kozin,<sup>a,e</sup> A. A. Kulikova,<sup>a,e</sup> A. N. Istrate,<sup>a,e</sup> P. O. Tsvetkov,<sup>a</sup> S. S. Zhokhov,<sup>b</sup> Y. V. Mezentsev,<sup>c</sup> O.I. Kechko,<sup>a</sup> A. S. Ivanov,<sup>c</sup> V. I. Polshakov<sup>d</sup> and A. A. Makarov<sup>\*a</sup>

<sup>a</sup> Engelhardt Institute of Molecular Biology, Russian Academy of Sciences, Vavilov St. 32, 119991 Moscow, Russia

<sup>b</sup> Chemistry Department, M.V.Lomonosov Moscow State University, 119191 Moscow, Russia

<sup>c</sup> Institute of Biomedical Chemistry, Pogodinskaya street 10/8, 119121 Moscow, Russia

<sup>d</sup> Faculty of Fundamental Medicine, M.V.Lomonosov Moscow State University, 119191 Moscow, Russia

<sup>e</sup> These authors made equal contributions to this manuscript.

\*E.mail: [aamakarov@eimb.ru](mailto:aamakarov@eimb.ru)

#### Table of contents

|                  |                                                                                                                                                                                                            |     |
|------------------|------------------------------------------------------------------------------------------------------------------------------------------------------------------------------------------------------------|-----|
|                  | Materials                                                                                                                                                                                                  | S3  |
|                  | Methods                                                                                                                                                                                                    | S3  |
| <b>Figure S1</b> | <sup>1</sup> H- <sup>15</sup> N HSQC spectrum of <sup>Ac</sup> H6R-A $\beta$ <sub>1-16</sub>                                                                                                               | S6  |
| <b>Figure S2</b> | <sup>1</sup> H NMR spectra of <sup>Ac</sup> H6R-A $\beta$ <sub>1-16</sub> at different peptide concentrations in presence of half mole equivalent of ZnCl <sub>2</sub> .                                   | S7  |
| <b>Figure S3</b> | Titration of human <sup>Ac</sup> H6R-A $\beta$ <sub>1-16</sub> peptide by ZnCl <sub>2</sub> in H <sub>2</sub> O                                                                                            | S8  |
| <b>Figure S4</b> | Titration of human <sup>Ac</sup> H6R-A $\beta$ <sub>1-16</sub> peptide by ZnCl <sub>2</sub> (aromatic and amide proton regions are shown) in H <sub>2</sub> O                                              | S9  |
| <b>Figure S5</b> | Titration of human <sup>Ac</sup> H6R-A $\beta$ <sub>1-16</sub> peptide by ZnCl <sub>2</sub> in D <sub>2</sub> O                                                                                            | S10 |
| <b>Figure S6</b> | Changes of the chemical shifts of the signals H $\epsilon$ 1 and H $\delta$ 2 of His13 and His14 residues during titration of the <sup>Ac</sup> H6R-A $\beta$ <sub>1-16</sub> peptide by ZnCl <sub>2</sub> | S11 |
| <b>Figure S7</b> | Fragment of ROESY spectrum of <sup>Ac</sup> H6R-A $\beta$ <sub>1-16</sub> in the presence of ZnCl <sub>2</sub>                                                                                             | S12 |

|                   |                                                                                                                                                            |     |
|-------------------|------------------------------------------------------------------------------------------------------------------------------------------------------------|-----|
| <b>Figure S8</b>  | Comparison of 1D spectra of H6R-A $\beta$ <sub>1-16</sub> and <sup>Ac</sup> H6R-A $\beta$ <sub>1-16</sub> in presence of ZnCl <sub>2</sub>                 | S13 |
| <b>Figure S9</b>  | Fragments of 2D NOESY spectra of H6R-A $\beta$ <sub>1-16</sub> and <sup>Ac</sup> H6R-A $\beta$ <sub>1-16</sub> in presence of ZnCl <sub>2</sub>            | S14 |
| <b>Figure S10</b> | Comparison of 1D spectra of <sup>Ac</sup> H6R-A $\beta$ <sub>1-16</sub> and human <sup>Ac</sup> A $\beta$ <sub>1-16</sub> in presence of ZnCl <sub>2</sub> | S15 |
| <b>Table S1</b>   | Thermodynamic parameters of zinc ions binding to <sup>Ac</sup> H6R-A $\beta$ <sub>1-16</sub> and H6R-A $\beta$ <sub>1-16</sub>                             | S16 |
| <b>Table S2</b>   | Chemical shifts of free <sup>Ac</sup> H6R-A $\beta$ <sub>1-16</sub>                                                                                        | S17 |
| <b>Table S3</b>   | Chemical shifts of the binary complex of <sup>Ac</sup> H6R-A $\beta$ <sub>1-16</sub> with Zn <sup>2+</sup>                                                 | S18 |
| <b>Table S4</b>   | Chemical shifts of the ternary complex of <sup>Ac</sup> H6R-A $\beta$ <sub>1-16</sub> dimer with Zn <sup>2+</sup>                                          | S19 |
| <b>Table S5</b>   | The data used for Job's plot                                                                                                                               | S20 |
|                   | References                                                                                                                                                 | S21 |

## MATERIALS

Chemicals and solvents were of HPLC-grade or better and were obtained from Sigma-Aldrich, USA. Reagents for SPR biosensor: HBS-EP+ buffer (150 mM NaCl, 10 mM HEPES, 3mM EDTA, 0.005% Surfactant P20, pH 7.4); 10 mM acetate buffers (pH 4.5); tiol coupling reagents kit; 1-ethyl-3-(3-dimethylaminopropyl)-carbodiimide (EDC); N-hydroxysuccinimide (NHS); 2-(2-pyridinyldithio)-ethaneamine (PDEA), were obtained from GE Healthcare Life Sciences, USA. Synthetic peptides (purity > 98%, checked by RP-HPLC) were purchased from Biopeptide Co., LLC, USA:

<sup>Ac</sup>A $\beta$ <sub>1-16</sub>: Acetyl-DAEFRRDSGYEVHHQK-Amide (for ITC and NMR);

<sup>Ac</sup>H6R-A $\beta$ <sub>1-16</sub>: Acetyl-DAEFRRDSGYEVHHQK-Amide (for SPR, ITC, NMR);

H6R-A $\beta$ <sub>1-16</sub>: DAEFRRDSGYEVHHQK-Amide (for ITC and NMR);

<sup>Ac</sup>H6R-A $\beta$ <sub>1-16</sub>-G4-C: Acetyl-DAEFRRDSGYEVHHQKGGGGC-Amide (for SPR).

N- and C-termini of the peptides were protected with acetyl and amide, respectively. N-terminus of H6R-A $\beta$ <sub>1-16</sub> was not protected. The amino acid sequence of peptides was confirmed on an ultra-high resolution Fourier transform ion cyclotron resonance mass-spectrometer Bruker 7T Apex-Qe (Bruker Daltonics, USA) using a de-novo sequencing approach based on collision induced dissociation (CID) fragmentation. The lyophilized peptides were dissolved in buffer before each experiment. The final peptide concentrations were determined by UV absorption spectroscopy using the extinction coefficient of 1450 M<sup>-1</sup> cm<sup>-1</sup> at 276 nm (from Tyr 10 of A $\beta$ ).

## METHODS

### Isothermal titration calorimetry (ITC)

Thermodynamic parameters of zinc binding to <sup>Ac</sup>A $\beta$ <sub>1-16</sub>, <sup>Ac</sup>H6R-A $\beta$ <sub>1-16</sub> and H6R-A $\beta$ <sub>1-16</sub> (Fig. 1, Table 1) were measured using a MicroCal iTC200 System (GE Healthcare Life Sciences, USA) as described previously (1). Experiments were carried out at 25°C in 50 mM Tris buffer, pH 7.3. Aliquots of ZnCl<sub>2</sub> solution (2  $\mu$ l) were injected into the 0.2 ml cell containing solution of peptides to achieve a complete binding isotherm (Fig. 1). Peptide concentration in the cell ranged from 0.25 to 0.75 mM and the ZnCl<sub>2</sub> concentration in the syringe ranged from 5 to 15 mM. Heat of dilution was measured by injecting the ligand (ZnCl<sub>2</sub>) into the buffer solution; the values obtained were subtracted from the heat of reaction to obtain the effective heat of binding. The resulting titration curves were fitted using MicroCal Origin

software. The association constant ( $K_a$ ) and binding stoichiometry ( $N$ ) were determined by a non-linear regression fitting procedure.

### **Surface Plasmon Resonance (SPR) Biosensing**

SPR measurements were performed with biosensor Biacore-T200 (GE Healthcare Life Sciences, USA) and the standard optical chips CM5 using Biacore Control v.3.1 and BiaEvaluation v.4.1 software for instrument operation. HBS-EP+ buffer was used for surface regeneration in SPR measurements. The running buffer was either 50 mM HEPES (pH 6.8) or the same buffer with 100  $\mu$ M  $ZnCl_2$ . Molecular interactions were registered as real time records of biosensor signals in resonant units (RU). Peptide immobilization on the optical chip was carried out according to a standard Biacore protocol for thiol coupling reagents kit (Sensor surface handbook, GE Healthcare Life Sciences, USA). The peptide H6R-A $\beta$ <sub>1-16</sub>-G4-C was immobilized in FC2 channel of the biosensor. The channel FC1 has been left blank for the correction of nonspecific effects. The peptide <sup>Ac</sup>H6R-A $\beta$ <sub>1-16</sub> was dissolved in the running buffer at different concentrations (2, 5, 10, 15, 20  $\mu$ M) and injected at a flow rate of 5  $\mu$ l/min for 5 min. Additionally the control experiment was carried out for different peptide concentrations (2, 5, 10, 15, 20  $\mu$ M) dissolved in the running buffer without  $ZnCl_2$ .

### **NMR experiments**

Peptides at concentration 0.2-2 mM were dissolved in 10 mM bis-Tris-d<sub>19</sub> (2,2-Bis(hydroxymethyl)-2,2',2''-nitrilotriethanol-d<sub>19</sub> with 98% <sup>2</sup>D enrichment) buffer solution (pH 6.8). Sodium salt of 3-(trimethylsilyl)propionic-2,2,3,3-d<sub>4</sub> acid (TSP) at concentration of 20 - 100  $\mu$ M was added as a standard to all NMR samples. To avoid pH variation upon zinc addition in NMR titration experiments, both peptide and  $ZnCl_2$  were dissolved in 20 mM bis-Tris-d<sub>19</sub> solution followed by the adjustment of pH to 6.8. NMR spectra were measured at the temperature range between 274 K and 308K either in D<sub>2</sub>O or in 90% H<sub>2</sub>O/10% D<sub>2</sub>O on a Bruker AVANCE 600 MHz spectrometer equipped with a triple resonance (<sup>1</sup>H, <sup>13</sup>C and <sup>15</sup>N) pulsed field z gradient probe (Bruker Biospin, Germany). 1D NMR spectra were processed by TopSpin 2.0 and Mnova NMR (Mestrelab Research, Spain). 2D NMR spectra were processed by NMRPipe (3) and analyzed using SPARKY (4). Precision of the chemical shift measurement for well resolved signals in the 1D spectra is ~0.001 ppm, and in the 2D spectra ~0.005 ppm. Chemical shifts in Job's titration experiments were measured using the line shape NMR signal fitting by Mnova NMR program. Precision of the chemical shift measurement in this case was better than

~0.0005 ppm. Precision of the measurements of integral intensities in 1D spectra is better than 3%, and in 2D spectra is better than 10%.

**NMR signal assignment.** The  $^1\text{H}$ ,  $^{15}\text{N}$  and  $^{13}\text{C}$  signal assignments of the human  $^{\text{Ac}}\text{H6R-A}\beta_{1-16}$  peptide and its complex with zinc were obtained using the following 2D spectra: DQF-COSY, TOCSY (mixing time of 70 ms), NOESY (mixing time of 200, 225 and 250 ms),  $^{13}\text{C}$ - $^1\text{H}$  HSQC and  $^{15}\text{N}$ - $^1\text{H}$  HSQC. Heteronuclear experiments were measured at the natural abundance of the  $^{13}\text{C}$  and  $^{15}\text{N}$  isotopes (Fig. S1).  $^{15}\text{N}$  resonance assignments were obtained for free peptides only, as the substantial zinc-induced signal broadening complicates collection of the heteronuclear correlation spectra at natural abundance of  $^{15}\text{N}$ . However resonance assignments for nearly all  $^1\text{H}$  and  $^{13}\text{C}$  nuclei were determined for all studied peptides and their complexes (Table S1-S3).

**NMR titration experiments.** Zinc binding to  $^{\text{Ac}}\text{H6R-A}\beta_{1-16}$  was elucidated using two types of NMR titration experiments. In the first series of experiments 1.1 mM peptide solution in 90%  $\text{H}_2\text{O}/10\%$   $\text{D}_2\text{O}$  and 10 mM bis-Tris- $\text{d}_{19}$  (pH 6.88) was titrated by the 4 mM solution of  $\text{ZnCl}_2$  dissolved in the same buffer with identical pH value. TSP at concentration of ~ 40  $\mu\text{M}$  was added as a standard. Molar ratio of zinc/peptide in these experiments was successively increased from 0 to 10. For each titration point 1D proton NMR spectra were recorded at 283K.

RMSD for the chemical shifts changes between the free and zinc-bound peptides for residue k were calculated using the following equation (1):

$$\text{RMSD}_k = \sqrt{\frac{\sum_{i=0}^{N_k} \left[ \frac{\delta_{\text{complex}}^i - \delta_{\text{free}}^i}{A} \right]^2}{N_k}} \quad (1)$$

,where  $N_k$  – number of measured resonances for the residue k, A - normalization factor (1 for  $^1\text{H}$  and 4 for  $^{13}\text{C}$  shifts) to take into account the difference in chemical shift ranges between  $^1\text{H}$  and  $^{13}\text{C}$  resonances.

Titration experiments of the second type were carried out using the method of continuous variations (5) in order to determine stoichiometry of zinc binding to  $^{\text{Ac}}\text{H6R-A}\beta_{1-16}$  peptide. Experiments involved preparation of the series of samples containing peptide and  $\text{ZnCl}_2$  in varying proportions but at a fixed total concentration ( $[\text{peptide}] + [\text{zinc}] = 0.6 \text{ mM}$ ). Changes of the peptide chemical shifts or integral intensities of the signals were analyzed. Plot of the product of change of the measured parameter and portion of the peptide ( $P_{\text{peptide}} \cdot \Delta\delta$ ) versus portion of zinc ( $P_{\text{zinc}}$ ) for each sample forms a curve with a maximum at  $P_{\text{zinc}}$  which corresponds to the stoichiometry of the complex (5).

**Figure S1.**  $^1\text{H}$ - $^{15}\text{N}$  HSQC spectrum of  $^{\text{Ac}}\text{H6R-A}\beta_{1-16}$  recorded at a natural abundance of the  $^{15}\text{N}$  nuclei at 283K. The peptide concentration was  $\sim 2.5$  mM. Spectrum was recorded in  $\text{H}_2\text{O}$  in the presence of 10 mM bis-Tris- $\text{d}_{19}$  buffer, pH 6.8.

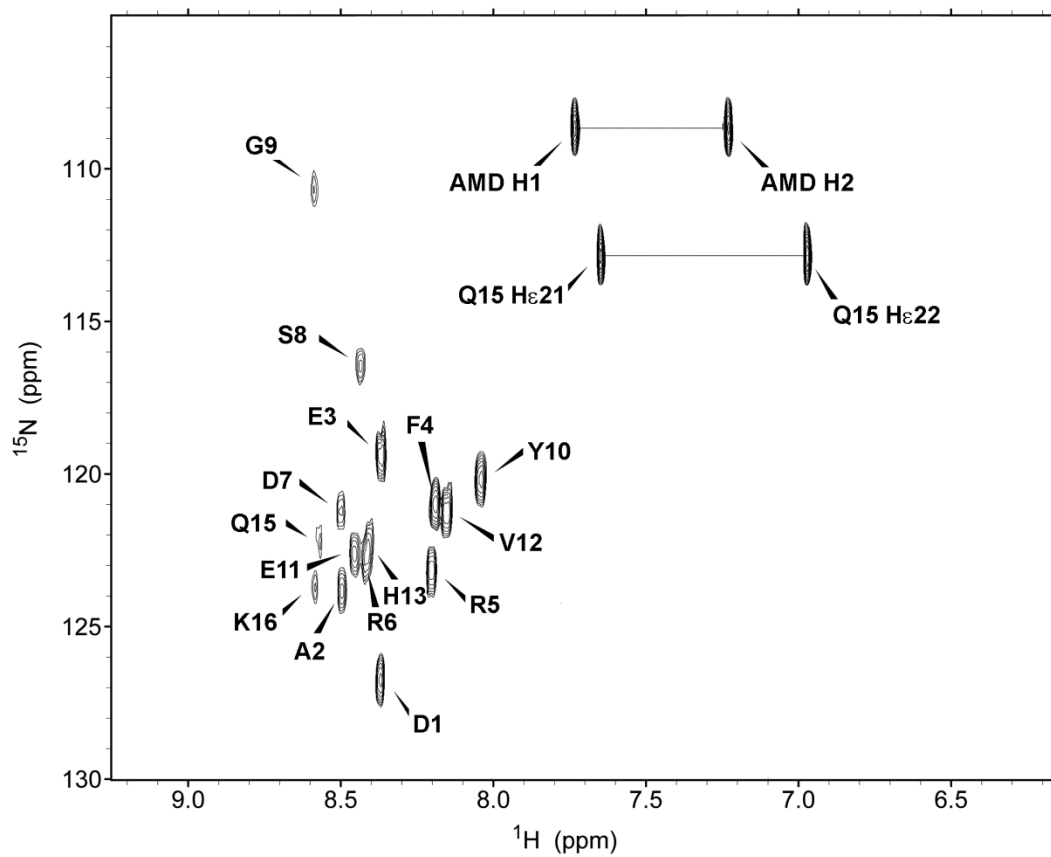

**Figure S2.** Aliphatic region (0.0 – 4.75 ppm) of the  $^1\text{H}$  NMR spectra of the human  $^{\text{Ac}}\text{H6R-A}\beta_{1-16}$  peptide in the presence of half mole equivalent of  $\text{ZnCl}_2$ . Spectra shown in black, blue and red correspond to the peptide concentration of 0.6, 1.1 and 2.2 mM and TSP concentration of 30, 60 and 60  $\mu\text{M}$ . Spectra were recorded in  $\text{H}_2\text{O}$ , 10 mM bis-Tris $_{\text{d}19}$ , pH 6.8, 283K and 600 MHz. Intensity of the signal at  $\sim 0.2$  ppm is proportional to the content of the dimeric form of the zinc-peptide complex  $\text{Zn}\cdot(^{\text{Ac}}\text{H6R-A}\beta_{1-16})_2$ .

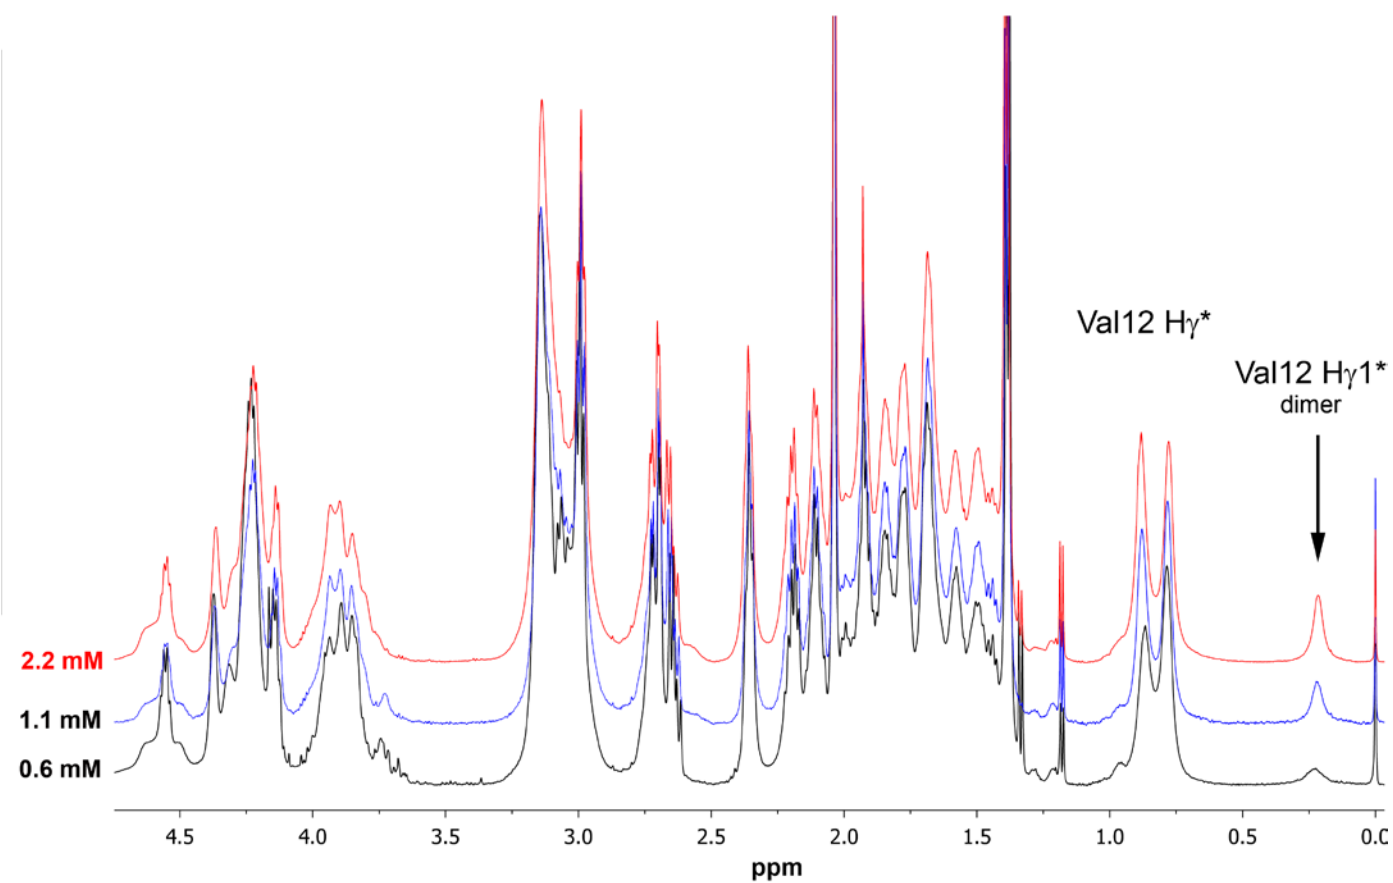

**Figure S3.** Titration of the human  $^{Ac}H6R-A\beta_{1-16}$  peptide (initial concentration  $\sim 1$  mM) by  $ZnCl_2$  in  $H_2O$ , 10 mM bis-Tris $_{d19}$ , 40  $\mu M$  TSP, pH 6.8. Spectra were recorded at 283K and 600 MHz. Molar ratio of the peptide and  $Zn^{2+}$  is shown for each spectrum.

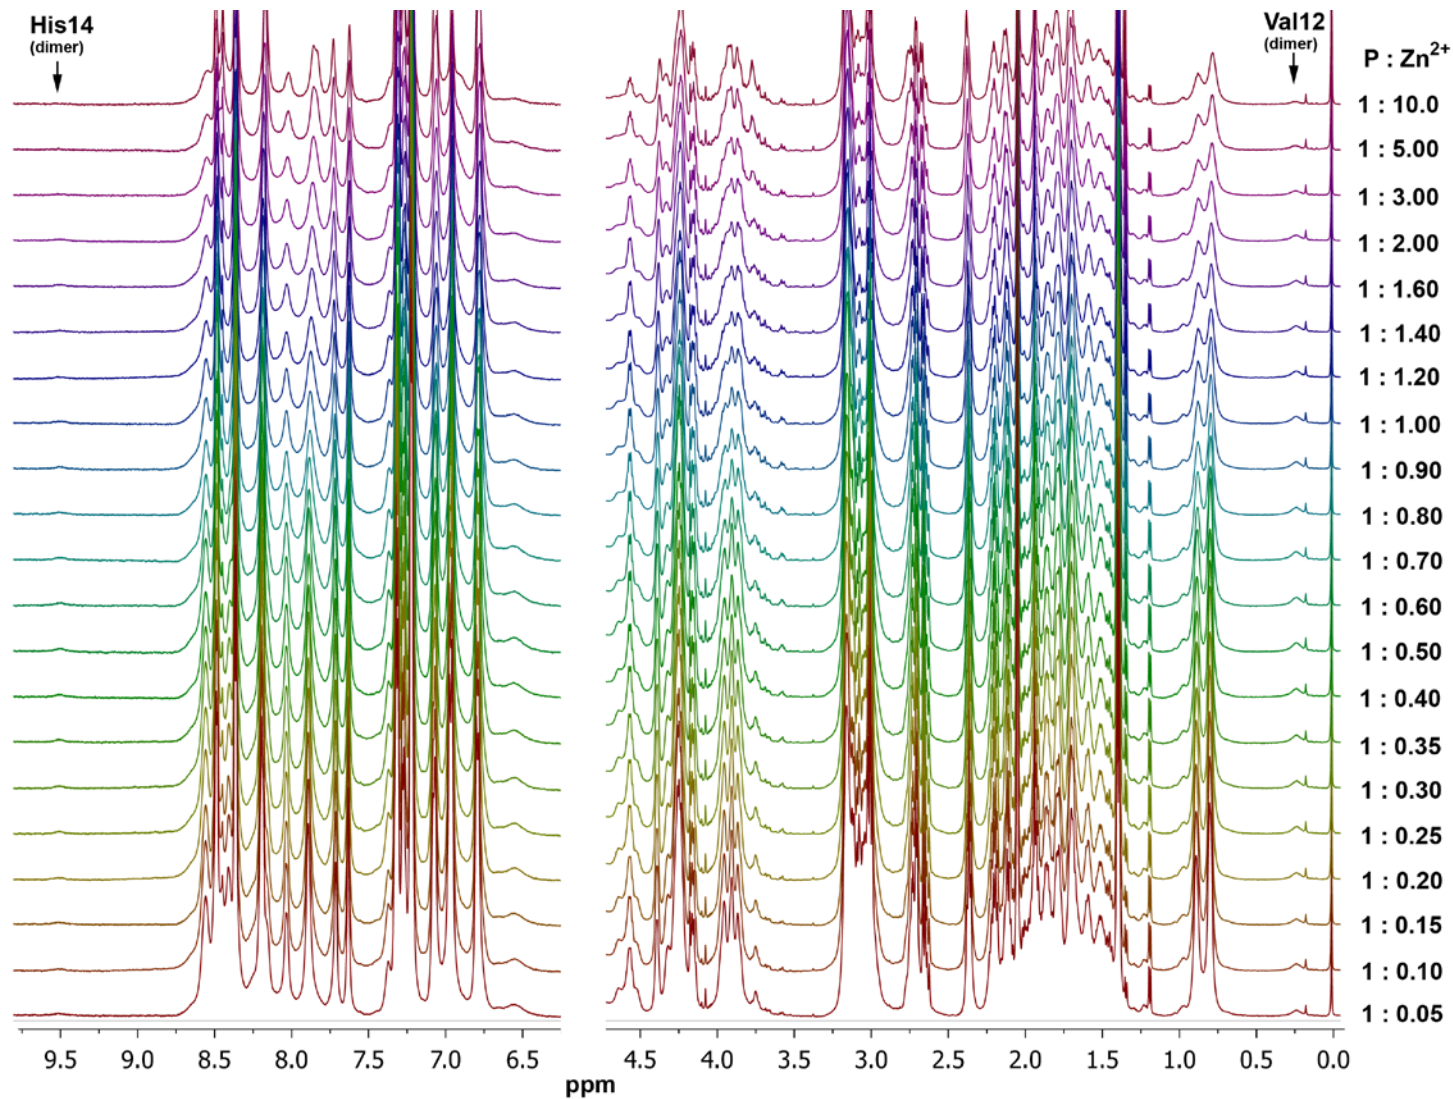



**Figure S4.** Titration of the human  $^{13}\text{C}$ H6R-A $\beta$ <sub>1-16</sub> peptide (initial concentration ~1 mM) by ZnCl<sub>2</sub> in H<sub>2</sub>O, 10 mM bis-Tris<sub>d19</sub>, pH 6.8. Spectra were recorded at 283K and 600 MHz. Figure shows aromatic and amide proton regions with the reduced intensity compared to Fig. S3.

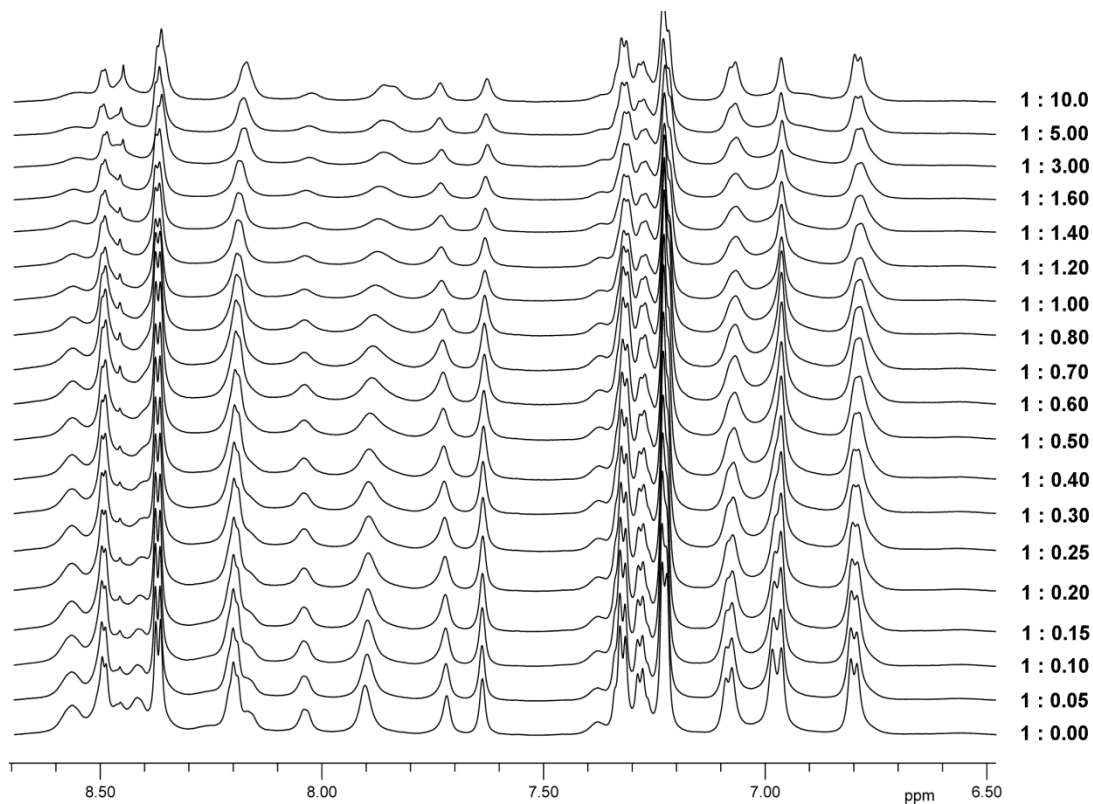

**Figure S5.** Titration of the human  $^{Ac}H6R-A\beta_{1-16}$  peptide (initial concentration  $\sim 1$  mM) by  $ZnCl_2$  in  $D_2O$ , 10 mM bis-Trisd19, measured at pH 6.85. Spectra were recorded at 283K and 600 MHz.

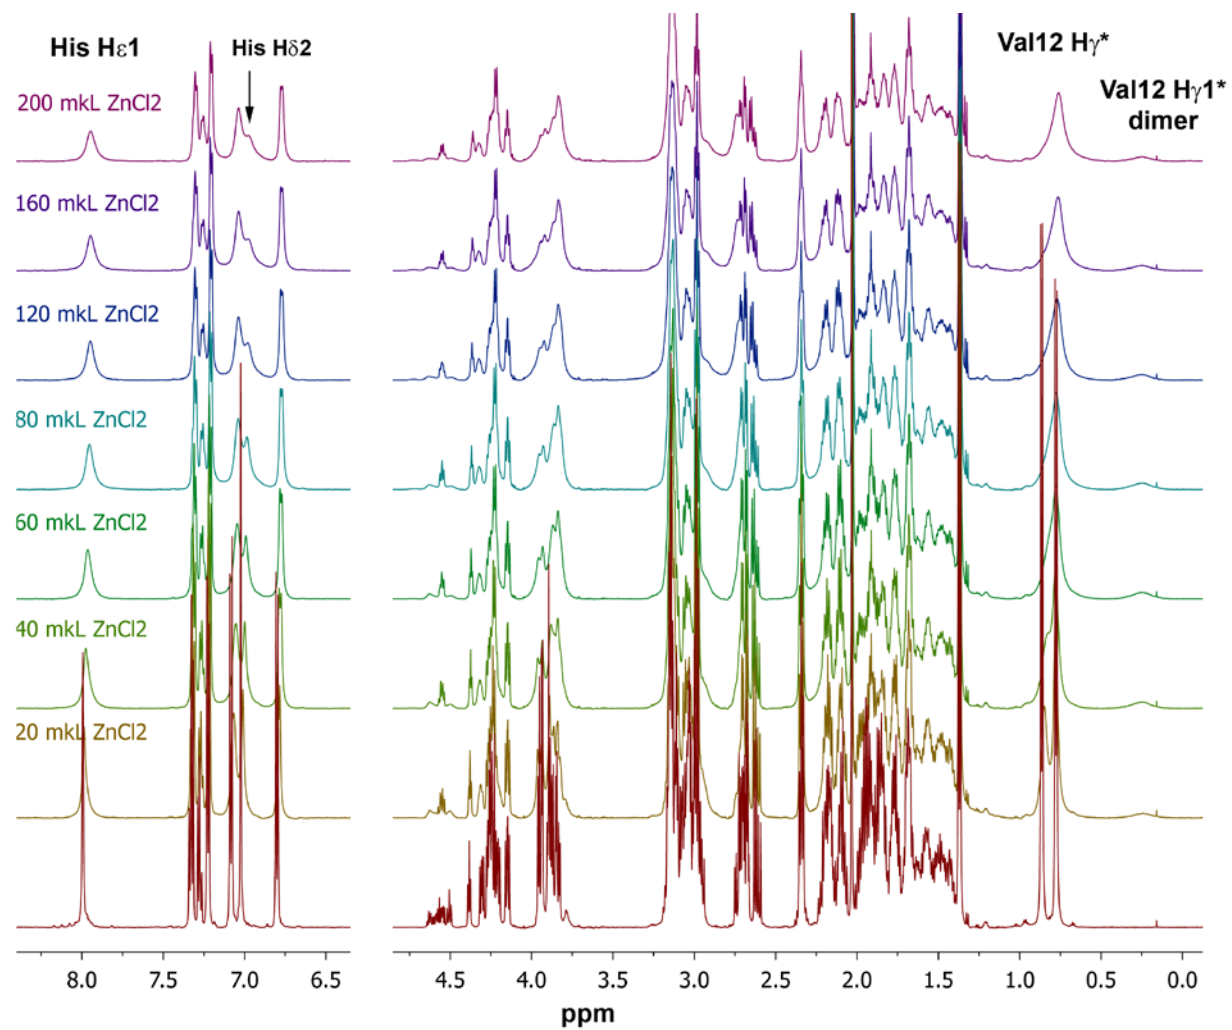

**Figure S6.** Changes of the chemical shifts of the signals H $\epsilon$ 1 and H $\delta$ 2 of His13 and His14 residues during titration of the  $^{Ac}H6R-A\beta_{1-16}$  peptide by ZnCl<sub>2</sub>. Initial concentration of the peptide was 1.1 mM. Final ratio [Zn<sup>2+</sup>]/[peptide] = 10.

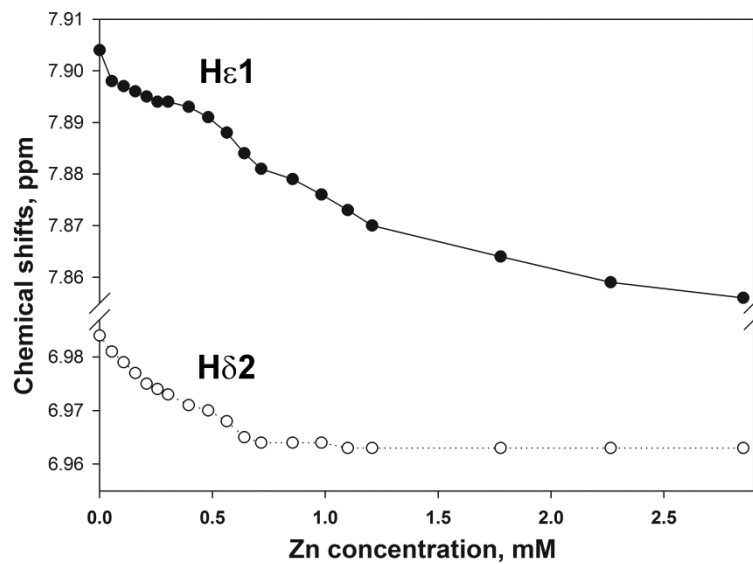

**Figure S7.** Fragment of ROESY spectrum of  $^{13}\text{C}$ -labeled  $\text{AcH6R-A}\beta_{1-16}$  in the presence of  $\text{ZnCl}_2$ . Spectrum was recorded at the peptide concentration 2.25 mM at 274K in  $\text{H}_2\text{O}$ , in the presence of 1.15 mM  $\text{ZnCl}_2$ , 10 mM bis-Tris $_{\text{d}19}$ , pH 6.86. Signals of Val12 are shown. ROESY mixing time is 100 ms. Positive cross-peaks (red) correspond to chemical exchange, negative cross-peaks (blue) arise from through-space dipole-dipole interactions of nuclei.

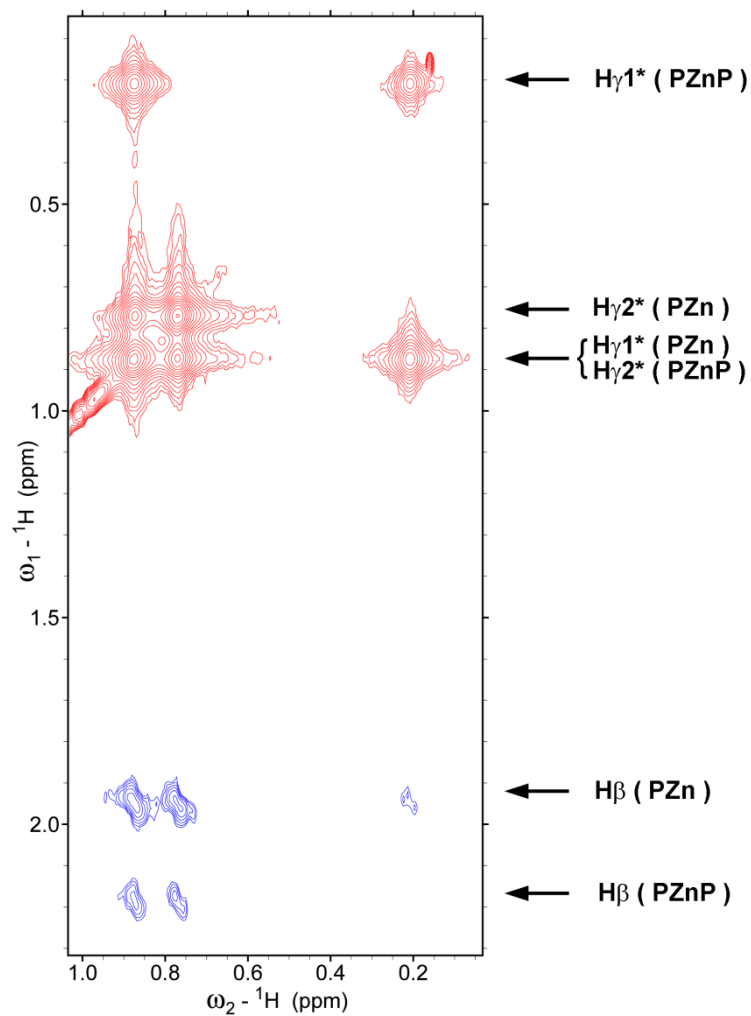

**Figure S8.** Comparison of 1D spectra of H6R-A $\beta_{1-16}$  (A) and  $^{13}\text{C}$ H6R-A $\beta_{1-16}$  (B) in the presence of half mole equivalent of ZnCl<sub>2</sub>. Spectra were recorded at the peptide concentration of 1.4mM at 278K in H<sub>2</sub>O, in the presence of 10 mM bis-Tris<sub>d19</sub>, pH 6.8. TSP was used as internal standard at the concentration of 20  $\mu\text{M}$  (A) and 60  $\mu\text{M}$  (B).

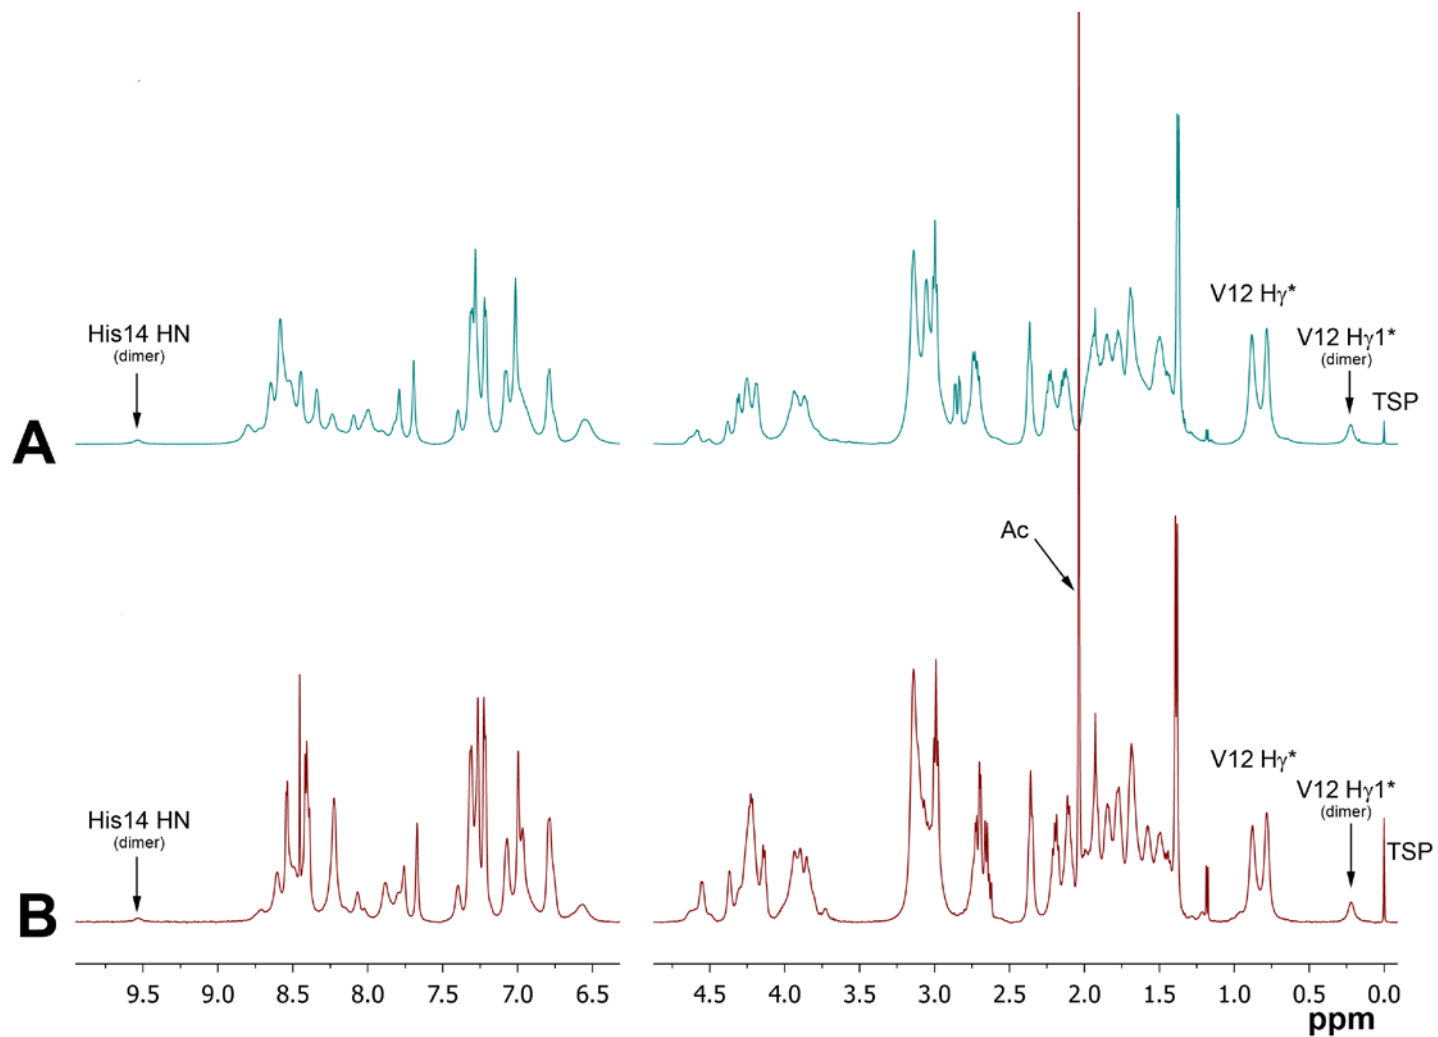

**Figure S9.** Fragments of 2D NOESY spectra of H6R-A $\beta$ <sub>1-16</sub> (A) and <sup>Ac</sup>H6R-A $\beta$ <sub>1-16</sub> (B) in the presence of half mole equivalent of ZnCl<sub>2</sub>. Concentration of the H6R-A $\beta$ <sub>1-16</sub> peptide is 1.1 mM, concentration of <sup>Ac</sup>H6R-A $\beta$ <sub>1-16</sub> is 2.25 mM. Spectra were recorded at 600 MHz, 274K in H<sub>2</sub>O, in the presence of 1.15 mM ZnCl<sub>2</sub>, 10 mM bis-Tris<sub>d19</sub>, pH 6.80 (A) and 6.86 (B). Regions of His14 HN resonance which belongs to the dimeric forms are shown. Identical NOE patterns indicate identical properties of N-Ac and non-acylated peptides.

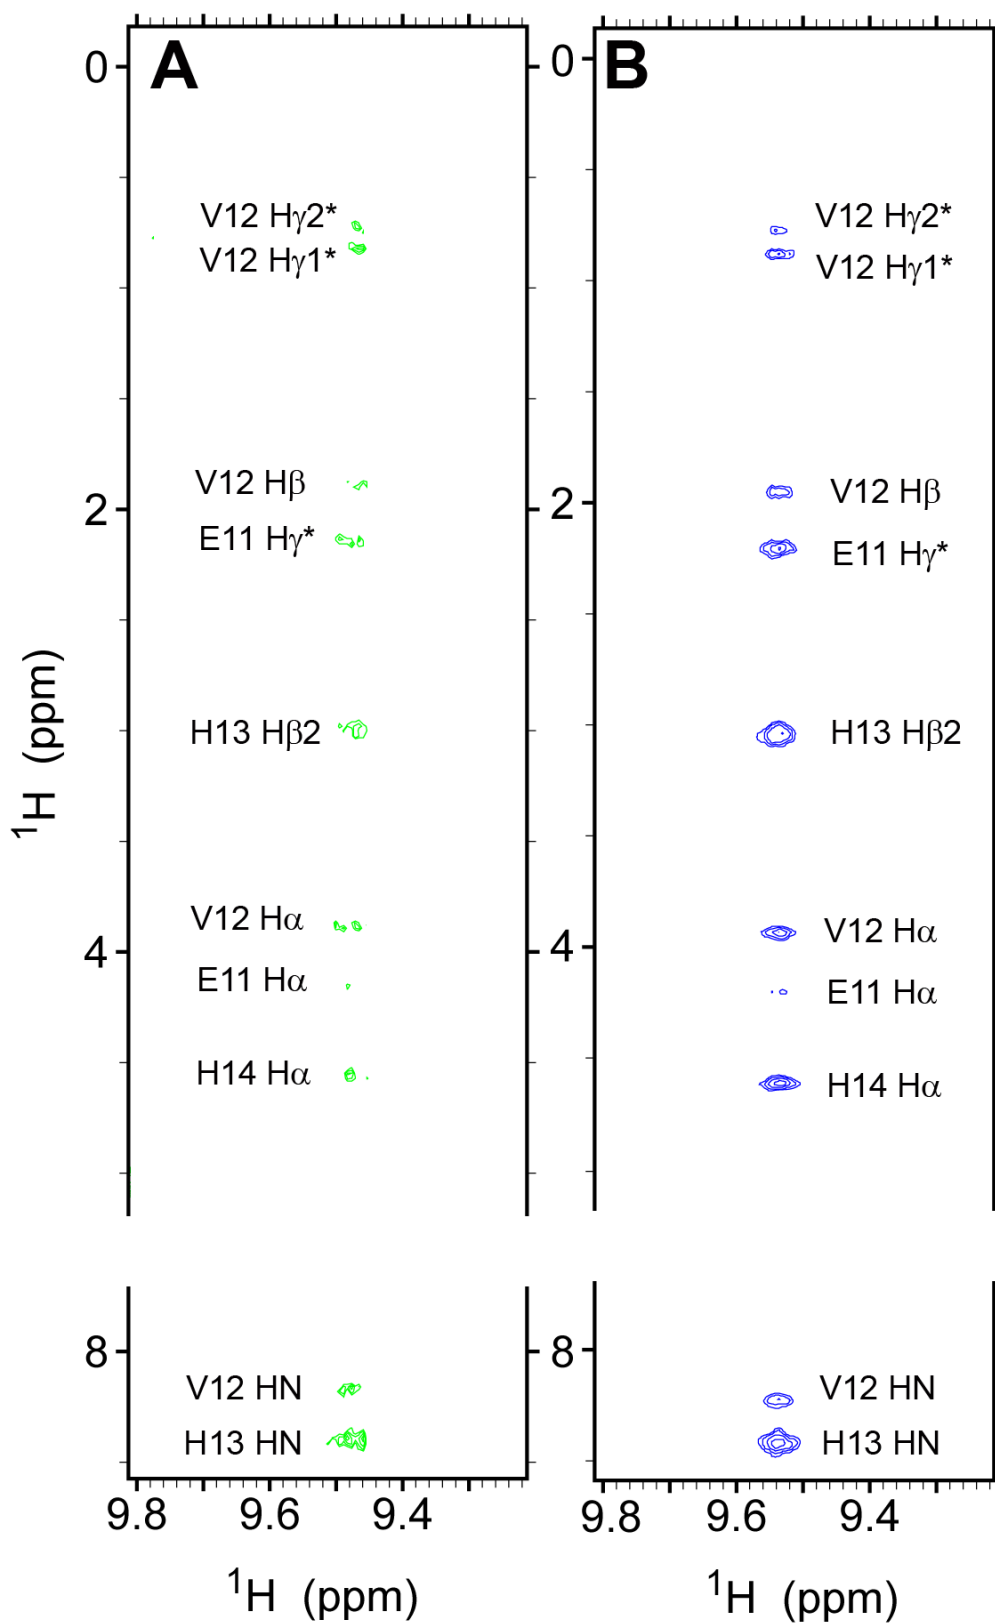

**Figure S10.** Comparison of 1D spectra of  $^{13}\text{C}$ -labeled  $^{\text{Ac}}\text{H6R-A}\beta_{1-16}$  (A) and wild-type human  $^{\text{Ac}}\text{A}\beta_{1-16}$  (B) in the presence of half mole equivalent of  $\text{ZnCl}_2$ . Spectra were recorded at the peptide concentration of 1.4mM at 278K in  $\text{H}_2\text{O}$ , in the presence of 10 mM bis-Tris $_{\text{d19}}$ , pH 6.8. TSP was used as internal standard at the concentration of 60  $\mu\text{M}$  (A) and 40  $\mu\text{M}$  (B).

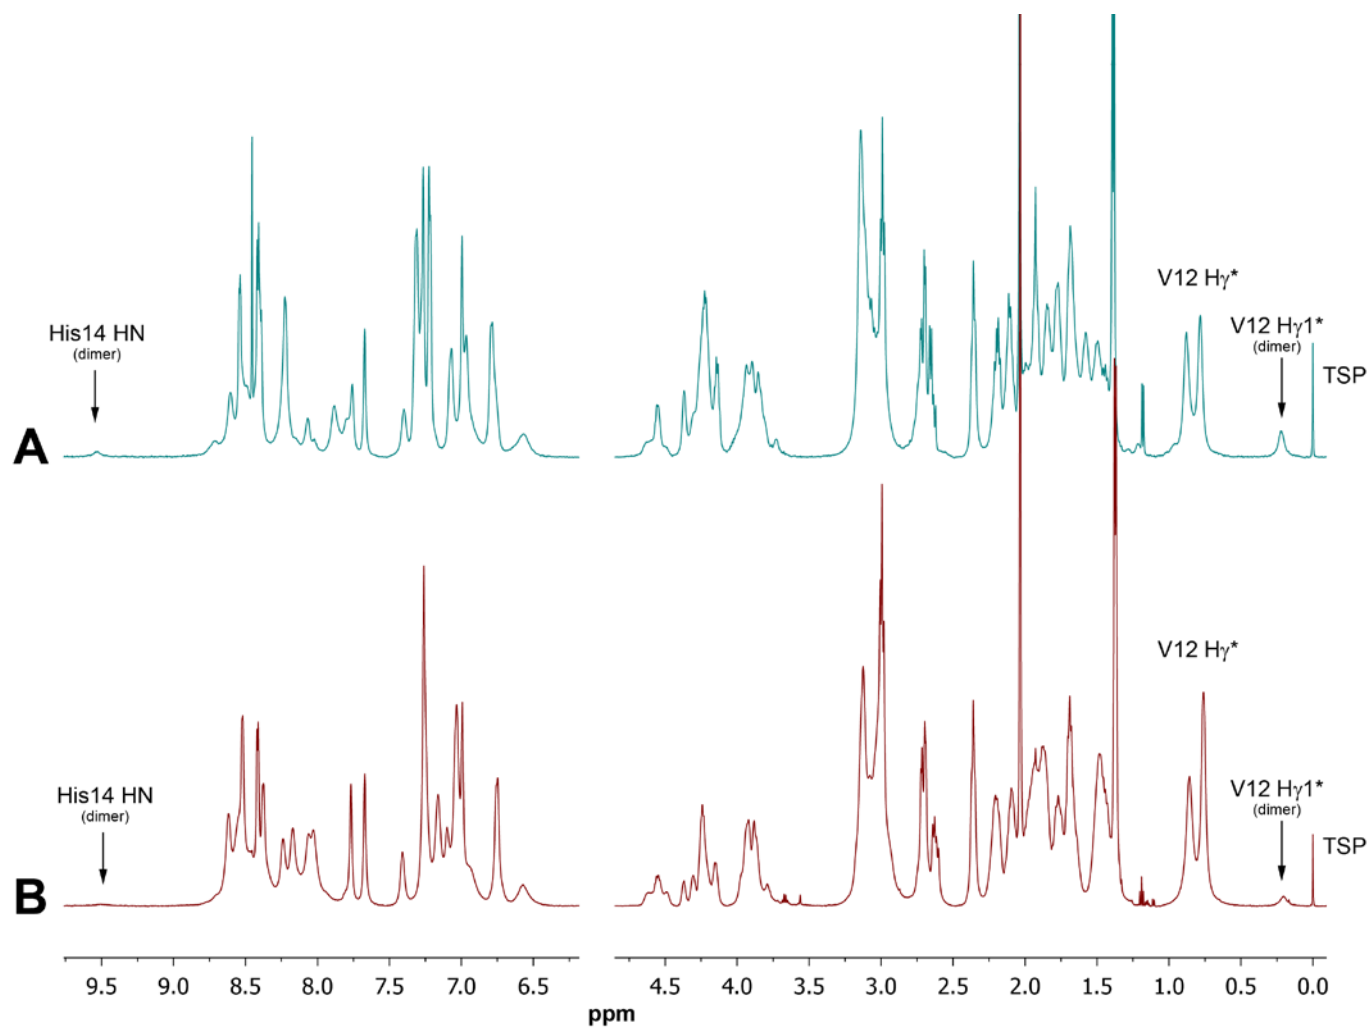

**Table S1.** Thermodynamic parameters of zinc ions binding to <sup>A</sup>cH6R-A $\beta$ <sub>1-16</sub> and H6R-A $\beta$ <sub>1-16</sub> obtained by ITC at 25°C in 50 mM Tris buffer, pH 7.3.

| Peptide                                     | $N^a$ | $K_a^b \times 10^{-4} \text{ (M}^{-2}\text{)}^c$ | $\Delta H^a \text{ (kcal M}^{-1}\text{)}$ | $T\Delta S \text{ (kcal M}^{-1}\text{)}$ |
|---------------------------------------------|-------|--------------------------------------------------|-------------------------------------------|------------------------------------------|
| <sup>A</sup> cH6R-A $\beta$ <sub>1-16</sub> | 0.5   | 0.24                                             | -5.6                                      | -1                                       |
| H6R-A $\beta$ <sub>1-16</sub>               | 0.5   | 0.23                                             | -3.1                                      | 1.5                                      |

<sup>a</sup>Standard deviation does not exceed  $\pm 10\%$ .

<sup>b</sup>Standard deviation does not exceed  $\pm 20\%$ .

<sup>c</sup>Due to peptide dimerization,  $K_a$  dimension is equal to  $\text{M}^{-2}$ .



**Table S2.** Chemical shifts (ppm) of the  $^1\text{H}$ ,  $^{13}\text{C}$  and  $^{15}\text{N}$  signals of free peptide  $^{\text{Ac}}\text{H6R-A}\beta_{1-16}$ .

| residue    | $^{15}\text{N}$ | $\text{C}\alpha$ | $\text{C}\beta$ | other $^{13}\text{C},^{15}\text{N}$                                                            | $\text{HN}$ | $\text{H}\alpha$ | $\text{H}\beta$ | $\text{H}\gamma$ | other $^1\text{H}$                                                                       |
|------------|-----------------|------------------|-----------------|------------------------------------------------------------------------------------------------|-------------|------------------|-----------------|------------------|------------------------------------------------------------------------------------------|
| <b>D1</b>  | 126.72          | 54.58            | 41.28           |                                                                                                | 8.37        | 4.55             | 2.70<br>2.63    |                  |                                                                                          |
| <b>A2</b>  | 123.82          | 53.02            | 18.91           |                                                                                                | 8.50        | 4.23             | 1.38            |                  |                                                                                          |
| <b>E3</b>  | 119.34          | 56.89            | 29.89           | 36.15 ( $\text{C}\gamma$ )                                                                     | 8.37        | 4.14             | 1.91            | 2.19<br>2.10     |                                                                                          |
| <b>F4</b>  | 121.00          | 57.91            | 39.27           | 131.74 ( $\text{C}\delta^*$ )<br>131.32 ( $\text{C}\epsilon^*$ )<br>129.84 ( $\text{C}\zeta$ ) | 8.19        | 4.56             | 3.11<br>3.07    |                  | 7.23 ( $\text{H}\delta^*$ )<br>7.33 ( $\text{H}\epsilon^*$ )<br>7.28 ( $\text{H}\zeta$ ) |
| <b>R5</b>  | 123.14          | 55.94            | 30.73           | 27.10 ( $\text{C}\gamma$ )<br>43.11 ( $\text{C}\delta$ )<br>84.62 ( $\text{N}\epsilon$ )       | 8.20        | 4.22             | 1.78<br>1.69    | 1.57<br>1.52     | 3.15 ( $\text{H}\delta^*$ )<br>7.37 ( $\text{H}\epsilon$ )                               |
| <b>R6</b>  | 122.83          | 56.04            | 30.60           | 27.03 ( $\text{C}\gamma$ )<br>43.11 ( $\text{C}\delta$ )<br>84.55 ( $\text{N}\epsilon$ )       | 8.42        | 4.25             | 1.84<br>1.77    | 1.64<br>1.59     | 3.15 ( $\text{H}\delta^*$ )<br>7.28 ( $\text{H}\epsilon$ )                               |
| <b>D7</b>  | 121.19          | 54.22            | 41.18           |                                                                                                | 8.50        | 4.64             | 2.74<br>2.70    |                  |                                                                                          |
| <b>S8</b>  | 116.37          | 58.96            | 63.53           |                                                                                                | 8.44        | 4.38             | 3.90<br>3.85    |                  |                                                                                          |
| <b>G9</b>  | 110.69          | 45.25            |                 |                                                                                                | 8.58        | 3.95<br>3.90     |                 |                  |                                                                                          |
| <b>Y10</b> | 120.18          | 58.25            | 38.75           | 133.13 ( $\text{C}\delta^*$ )<br>118.02 ( $\text{C}\epsilon^*$ )                               | 8.04        | 4.50             | 3.04<br>2.97    |                  | 7.09 ( $\text{H}\delta^*$ )<br>6.80 ( $\text{H}\epsilon^*$ )                             |
| <b>E11</b> | 122.60          | 56.47            | 30.24           | 36.15 ( $\text{C}\gamma$ )                                                                     | 8.46        | 4.20             | 1.93<br>1.87    | 2.21<br>2.17     |                                                                                          |
| <b>V12</b> | 121.21          | 62.73            | 32.46           | 20.69 ( $\text{C}\gamma_1$ )<br>20.78 ( $\text{C}\gamma_2$ )                                   | 8.15        | 3.93             | 1.95            | 0.88<br>0.78     |                                                                                          |
| <b>H13</b> | 122.23          | 55.81            | 30.25           | 119.54 ( $\text{C}\delta_2$ )<br>137.64 ( $\text{C}\epsilon_1$ )                               | 8.41        | 4.63             | 3.10<br>3.04    |                  | 7.01 ( $\text{H}\delta_2$ )<br>7.95 ( $\text{H}\epsilon_1$ )                             |
| <b>H14</b> | 121.11          | 56.01            | 30.37           | 119.54 ( $\text{C}\delta_2$ )<br>137.64 ( $\text{C}\epsilon_1$ )                               | 8.35        | 4.59             | 3.12<br>3.02    |                  | 7.01 ( $\text{H}\delta_2$ )<br>7.95 ( $\text{H}\epsilon_1$ )                             |
| <b>Q15</b> | 122.17          | 55.73            | 29.22           | 33.54 ( $\text{C}\gamma$ )<br>112.86 ( $\text{N}\epsilon_2$ )                                  | 8.57        | 4.31             | 2.11<br>1.99    | 2.36             | 7.65 ( $\text{H}\epsilon_{21}$ )<br>6.97 ( $\text{H}\epsilon_{22}$ )                     |
| <b>K16</b> | 123.71          | 56.19            | 32.95           | 24.84 ( $\text{C}\gamma$ )<br>28.93 ( $\text{C}\delta$ )<br>41.77 ( $\text{C}\epsilon$ )       | 8.59        | 4.26             | 1.86<br>1.79    | 1.49<br>1.44     | 1.69 ( $\text{H}\delta^*$ )<br>2.99 ( $\text{H}\epsilon^*$ )                             |

**Table S3.** Chemical shifts (ppm) of the  $^1\text{H}$ ,  $^{13}\text{C}$  and  $^{15}\text{N}$  signals of the binary complex of peptide  $^{\text{Ac}}\text{H6R-A}\beta_{1-16}$  with  $\text{Zn}^{2+}$ .

| residue    | $^{15}\text{N}$ | $\text{C}\alpha$ | $\text{C}\beta$ | other $^{13}\text{C}$                                                                          | $\text{HN}$ | $\text{H}\alpha$ | $\text{H}\beta$ | $\text{H}\gamma$ | other $^1\text{H}$                                                                       |
|------------|-----------------|------------------|-----------------|------------------------------------------------------------------------------------------------|-------------|------------------|-----------------|------------------|------------------------------------------------------------------------------------------|
| <b>D1</b>  | 126.92          | 54.51            | 41.17           |                                                                                                | 8.41        | 4.56             | 2.71<br>2.65    |                  |                                                                                          |
| <b>A2</b>  | 123.84          | 53.21            | 18.92           |                                                                                                | 8.54        | 4.22             | 1.38            |                  |                                                                                          |
| <b>E3</b>  | 119.47          | 56.95            | 29.79           | 35.95 ( $\text{C}\gamma$ )                                                                     | 8.39        | 4.14             | 1.92            | 2.20<br>2.12     |                                                                                          |
| <b>F4</b>  | 121.12          | 58.16            | 39.18           | 131.72 ( $\text{C}\delta^*$ )<br>131.37 ( $\text{C}\epsilon^*$ )<br>129.80 ( $\text{C}\zeta$ ) | 8.21        | 4.54             | 3.12<br>3.07    |                  | 7.21 ( $\text{H}\delta^*$ )<br>7.30 ( $\text{H}\epsilon^*$ )<br>7.26 ( $\text{H}\zeta$ ) |
| <b>R5</b>  | 123.11          | 56.36            | 30.66           | 27.32 ( $\text{C}\gamma$ )<br>43.10 ( $\text{C}\delta$ )<br>84.42 ( $\text{N}\epsilon$ )       | 8.20        | 4.19             | 1.79<br>1.70    | 1.58<br>1.51     | 3.14 ( $\text{H}\delta^*$ )<br>7.39 ( $\text{H}\epsilon$ )                               |
| <b>R6</b>  | 122.67          | 56.11            | 30.55           | 27.10 ( $\text{C}\gamma$ )<br>43.10 ( $\text{C}\delta$ )<br>84.35 ( $\text{N}\epsilon$ )       | 8.39        | 4.23             | 1.85<br>1.78    | 1.65<br>1.58     | 3.15 ( $\text{H}\delta^*$ )<br>7.29 ( $\text{H}\epsilon$ )                               |
| <b>D7</b>  | 121.31          | 54.13            | 40.77           |                                                                                                | 8.49        | 4.65             | 2.76<br>2.70    |                  |                                                                                          |
| <b>S8</b>  | 116.90          | 58.90            | 63.45           |                                                                                                | 8.45        | 4.35             | 3.91<br>3.84    |                  |                                                                                          |
| <b>G9</b>  | 110.80          | 45.12            |                 |                                                                                                | 8.57        | 3.92             |                 |                  |                                                                                          |
| <b>Y10</b> | 120.23          | 58.24            | 38.92           | 133.11 ( $\text{C}\delta^*$ )<br>117.97 ( $\text{C}\epsilon^*$ )                               | 8.06        | 4.49             | 3.04<br>2.95    |                  | 7.07 ( $\text{H}\delta^*$ )<br>6.78 ( $\text{H}\epsilon^*$ )                             |
| <b>E11</b> |                 | 55.98            | 29.92           | 35.78 ( $\text{C}\gamma$ )                                                                     | 8.47        | 4.20             | 1.92<br>1.88    | 2.20             |                                                                                          |
| <b>V12</b> |                 | 62.62            |                 | 20.63 ( $\text{C}\gamma_1$ )<br>20.69 ( $\text{C}\gamma_2$ )                                   | 8.21        | 3.93             | 1.95            | 0.87<br>0.76     |                                                                                          |
| <b>H13</b> |                 | 55.94            |                 |                                                                                                | 8.41        | 4.61             |                 |                  | 6.97 ( $\text{H}\delta_2$ )<br>7.89 ( $\text{H}\epsilon_1$ )                             |
| <b>H14</b> |                 | 55.96            |                 |                                                                                                | 8.19        | 4.57             | 3.15<br>3.10    |                  | 6.97 ( $\text{H}\delta_2$ )<br>7.89 ( $\text{H}\epsilon_1$ )                             |
| <b>Q15</b> |                 | 55.69            | 29.44           | 33.55 ( $\text{C}\gamma$ )<br>113.17 ( $\text{N}\epsilon_2$ )                                  | 8.54        | 4.32             | 2.11<br>2.00    | 2.37             | 7.67<br>( $\text{H}\epsilon_{21}$ )<br>7.00<br>( $\text{H}\epsilon_{22}$ )               |
| <b>K16</b> | 123.83          | 56.28            | 32.94           | 24.85 ( $\text{C}\gamma$ )<br>28.98 ( $\text{C}\delta$ )<br>41.73 ( $\text{C}\epsilon$ )       | 8.63        | 4.25             | 1.84<br>1.79    | 1.49<br>1.44     | 1.69 ( $\text{H}\delta^*$ )<br>3.00 ( $\text{H}\epsilon^*$ )                             |

**Table S4.** Chemical shifts (ppm) of the  $^1\text{H}$ ,  $^{13}\text{C}$  and  $^{15}\text{N}$  signals of the ternary complex of human peptide  $^{\text{Ac}}\text{H6R-A}\beta_{1-16}$  dimer with  $\text{Zn}^{2+}$ . Only the signals which have chemical shift values different from the monomeric zinc-peptide complex are shown in the table.

| residue    | $\text{C}\alpha$ | $\text{C}\beta$ | other $^{13}\text{C}$                                            | HN   | $\text{H}\alpha$ | $\text{H}\beta$ | $\text{H}\gamma$ | other $^1\text{H}$                                           |
|------------|------------------|-----------------|------------------------------------------------------------------|------|------------------|-----------------|------------------|--------------------------------------------------------------|
| <b>G9</b>  | 44.92            |                 |                                                                  | 8.57 | 4.01             |                 |                  |                                                              |
| <b>Y10</b> | 57.04            | 38.97           | 132.69 ( $\text{C}\delta^*$ )<br>118.05 ( $\text{C}\epsilon^*$ ) | 8.18 | 4.75             | 2.79            |                  | 6.98 ( $\text{H}\delta^*$ )<br>6.76 ( $\text{H}\epsilon^*$ ) |
| <b>E11</b> | 56.37            |                 |                                                                  | 8.23 | 3.99             |                 |                  |                                                              |
| <b>V12</b> | 60.90            |                 | 16.34 ( $\text{C}\gamma_1$ )                                     | 7.78 | 4.61             | 2.19            | 0.23<br>0.87     |                                                              |
| <b>H13</b> | 57.04            |                 |                                                                  | 9.54 | 4.76             | 3.03            |                  | 8.02 ( $\text{H}\epsilon_1$ )                                |
| <b>H14</b> |                  |                 |                                                                  |      |                  |                 |                  | 8.02 ( $\text{H}\epsilon_1$ )                                |
| <b>Q15</b> |                  |                 | 33.34 ( $\text{C}\gamma$ )                                       | 8.79 | 4.36             | 2.12<br>2.00    | 2.27<br>2.20     |                                                              |
| <b>K16</b> |                  | 32.32           |                                                                  | 8.74 | 4.25             | 1.96            |                  |                                                              |

**Table S5.** The data used for Job's plot (Fig. 4). Total concentration of [peptide] and  $[\text{Zn}^{2+}]$  was kept at 0.6 mM in all samples. Spectra were recorded in  $\text{D}_2\text{O}$  solution of 10 mM bis-Tris<sub>d19</sub>, with pH 6.9. TSP was used as internal standard for measurement of chemical shifts. The values of chemical shifts were determined by line shape fitting of the signals using Mnova NMR software (Mestrelab Research, Spain). Relative Val12<sup>dimer</sup> intensity is the ratio of the well-resolved integral intensity of the signal at ~0.2 ppm to the integral intensity of all signals Val12 for the methyl groups (0.2 – 0.9 ppm).

| Sample | Zn portion (pZn) | Peptide portion (pP) | Chemical shift of His H $\delta$ , ppm | $\Delta\delta(\text{His H}\delta)$ , ppm | $10 \cdot \Delta\delta \cdot \text{pP}$ | Relative Val12 <sup>dimer</sup> intensity ( $I^{\text{Val12}}$ ) | $\Delta I^{\text{Val12}} \cdot \text{pP}$ |
|--------|------------------|----------------------|----------------------------------------|------------------------------------------|-----------------------------------------|------------------------------------------------------------------|-------------------------------------------|
| 1      | 0.000            | 1.000                | 7.0060                                 | 0.0000                                   | 0.0000                                  | 0.000                                                            | 0.0000                                    |
| 2      | 0.125            | 0.875                | 7.0017                                 | 0.0043                                   | 0.0375                                  | 0.050                                                            | 0.0438                                    |
| 3      | 0.250            | 0.750                | 6.9950                                 | 0.0110                                   | 0.0825                                  | 0.082                                                            | 0.0615                                    |
| 4      | 0.334            | 0.666                | 6.9880                                 | 0.0180                                   | 0.1199                                  | 0.103                                                            | 0.0686                                    |
| 5      | 0.375            | 0.625                | 6.9850                                 | 0.0210                                   | 0.1312                                  | 0.106                                                            | 0.0663                                    |
| 6      | 0.500            | 0.500                | 6.9780                                 | 0.0280                                   | 0.1400                                  | 0.110                                                            | 0.0550                                    |
| 7      | 0.625            | 0.375                | 6.9750                                 | 0.0310                                   | 0.1163                                  | 0.100                                                            | 0.0375                                    |
| 8      | 0.750            | 0.250                | 6.9718                                 | 0.0342                                   | 0.0855                                  | 0.080                                                            | 0.0200                                    |

## REFERENCES

1. Hauryliuk, V., Mitkevich, V. A., Eliseeva, N. A., Petrushanko, I. Y., Ehrenberg, M., and Makarov, A. A. (2008) The pretranslocation ribosome is targeted by GTP-bound EF-G in partially activated form, *Proceedings of the National Academy of Sciences* 105, 15678-15683.
3. Delaglio, F., Grzesiek, S., Vuister, G. W., Zhu, G., Pfeifer, J., and Bax, A. (1995) NMRPipe: a multidimensional spectral processing system based on UNIX pipes, *J. Biomol. NMR* 6, 277-293.
4. Goddard, T. D., and Kneller, D. G. <http://www.cgl.ucsf.edu/home/sparky>.
5. Gil, V. M. S., and Oliveira, N. C. (1990) On the Use of the Method of Continuous Variations, *J Chem Educ* 67, 473-478.
